# Supplementary material
Source: PubMed Central journal article supplement (PMC5993608)
Supplement: NIHMS951762-supplement-Supplemental_Information.pdf [file NIHMS951762-supplement-Supplemental_Information.pdf]

## Supporting information

### Antibiotic combinations that enable one-step, targeted mutagenesis of chromosomal genes

Wonsik Lee<sup>1</sup>, Truc Do<sup>1</sup>, Ge Zhang<sup>1,2</sup>, Daniel Kahne<sup>2</sup>, Timothy C. Meredith<sup>1,3</sup> and Suzanne Walker<sup>1\*</sup>

<sup>1</sup>Department of Microbiology and Immunobiology, Harvard Medical School, Boston, 4 Blackfan Circle Boston, MA 02115, Massachusetts, 02115, United States

<sup>2</sup>Department of Chemistry and Chemical Biology, Harvard University, 12 Oxford Street, Cambridge, Cambridge, Massachusetts, 02138, United States

<sup>3</sup>Department of Biochemistry and Molecular Biology, Pennsylvania State University, 206 South Frear Laboratory, University Park, Pennsylvania 16802, United States

\* To whom correspondence should be addressed.

Email: [suzanne\\_walker@hms.harvard.edu](mailto:suzanne_walker@hms.harvard.edu)

| <b>Table of contents</b>                                                                                              |       |
|-----------------------------------------------------------------------------------------------------------------------|-------|
| contents                                                                                                              | page  |
| mNeonGFP DNA sequence (5' → 3')                                                                                       | 2     |
| <b>Figure S1.</b> <i>S. aureus</i> $\Delta tarO$ is resistant to targocil and targocil-II.                            | 3     |
| <b>Figure S2.</b> Construction and map of pTarKO plasmid.                                                             | 4     |
| <b>Figure S3.</b> Schematic of allelic exchange with the pTarKO targeting plasmid in <i>S. aureus</i> .               | 5     |
| <b>Figure S4.</b> Both $\Delta rodA$ and $\Delta ezrA$ show severe growth defects at the elevated temperature of 43°C | 6     |
| <b>Figure S5.</b> UgtP is synthetically lethal with inhibition of wall teichoic acid biosynthesis.                    | 7     |
| <b>Figure S6.</b> Schematic of the two-step process to delete <i>ltaA</i> using pTarKO.                               | 8     |
| <b>Figure S7.</b> Construction of an inducible <i>tarO</i> strain.                                                    | 9     |
| <b>Figure S8.</b> Markerless deletion of <i>spa</i> using FRT/FLP recombinase.                                        | 10    |
| <b>Figure S9.</b> PCR validation of allelic exchange of target loci.                                                  | 11    |
| <b>Figure S10.</b> Allelic exchange of the <i>adeFGH</i> locus with pColKO- <i>adeFGH</i> in <i>A. baumannii</i> .    | 12    |
| <b>Table S1.</b> Strains and Plasmids                                                                                 | 13-14 |
| <b>Table S2.</b> Primers                                                                                              | 15-16 |
| <b>Table S3.</b> Synthetic lethal with $\Delta tarO$                                                                  | 17    |

**mNeonGFP DNA sequence (5' → 3')**

ATGGTGAGTAAAGGTGAGGAGGATAACATGGCTTCTTTACCTGCGACTCATGAATTACACATTTTTGGATCAATTAACGGCGT  
TGATTTTGACATGGTGGGACAAGGCACGGGCAACCCAAACGATGGCTATGAAGAGTTGAACTTGAAGTCTACGAAGGGTGA  
TACAGTTTTACCATGGATCTTAGTCCCAGCATATTGGATATGGTTCCACCAATACTTGCCGTACCCGGACGGTATGTCTCCAT  
TTCAAGCAGCTATGGTCGACGGAAGTGGCTACCAGGTCCATAGAACAATGCAGTTTGAGGATGGCGCAAGTTTGACAGTTAAC  
TACAGATACACATACGAGGGAAGTCACATCAAGGGAGAAGCTCAGGTAAAGGGTACAGGCTTCCGGCGGATGGTCCAGTCAT  
GACAAACAGTTTAAACGGCAGCGGATTGGTGTCTTTCAAAAAAACATATCCAAATGATAAGACTATCATCTCTACATTCAAAT  
GGTCTTACACAACCTGGAAACGGTAAAAGATATCGATCAACGGCGGAACAACGTACACATTCGCTAAGCCGATGGCGGCGAACT  
ATTTGAAGAACCAACCGATGTATGTGTTTAGAAAAACGGAATTGAAGCACAGTAAGACGGAGTTAAACTTTAAAGAGTGGCAG  
AAAGCGTTTACGGACGTTATGGGAATGGATGAGTTGTATAAATAA

## Supplementary Figures

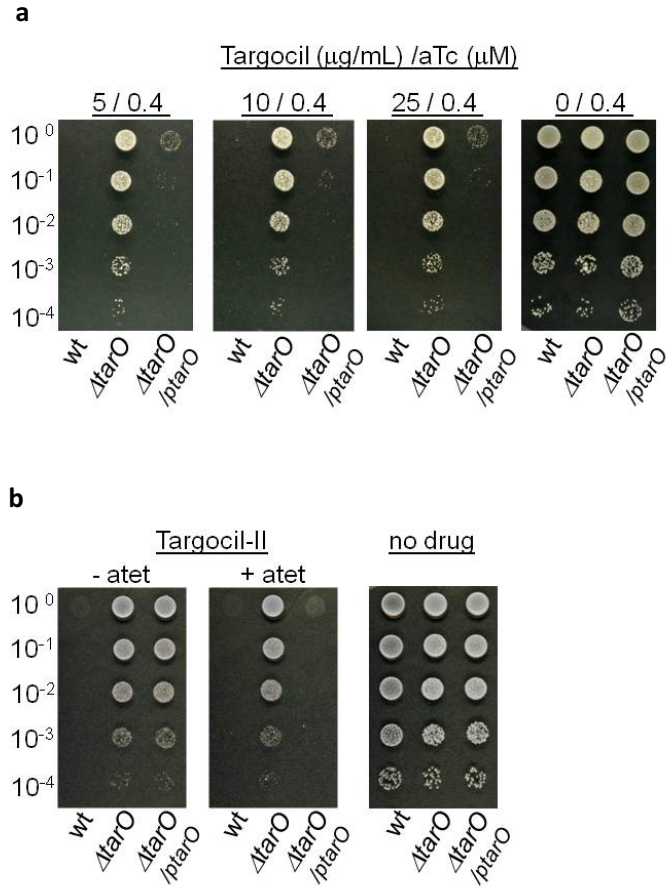

**Figure S1. *S. aureus*  $\Delta tarO$  is resistant to targocil and targocil-II.** (a)  $\Delta tarO$ , the complementation strain  $\Delta tarO/ptarO$ , and wildtype (wt) were tested against targocil (5, 10, or 25  $\mu\text{g/mL}$ ) in the presence of 0.4  $\mu\text{M}$  anhydrotetracycline (aTc) to induce *ptarO* expression. The phenotype is complementable. (b) Susceptibility of  $\Delta tarO$ ,  $\Delta tarO/ptarO$ , and wildtype were also tested against 10  $\mu\text{g/mL}$  targocil-II in the presence or absence of aTc.

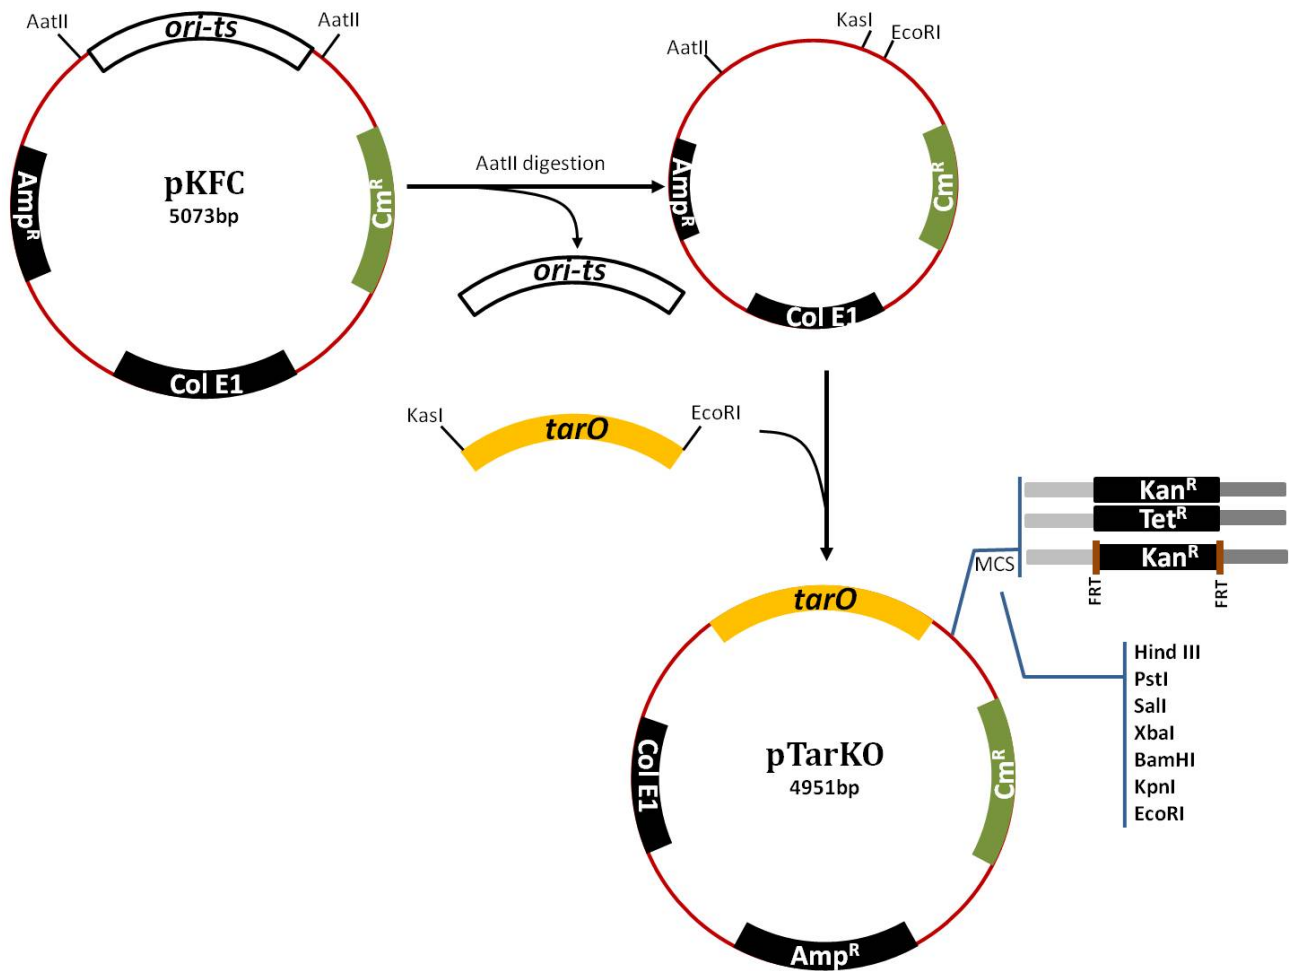

**Figure S2. Construction and map of pTarKO plasmid.** The temperature sensitive replication origin (*ori-ts*) for *S. aureus* found in the pKFC vector was removed and the *tarO* gene sequence with its native promoter was added. pTarKO contains the following features: *ColE1* (replication origin for *E. coli*), *Cm<sup>R</sup>* (chloramphenicol acetyltransferase), *Amp<sup>R</sup>* ( $\beta$ -lactamase), and a multiple cloning site (MCS). Antibiotic resistant markers for pTarKO: *Kan<sup>R</sup>* (aminoglycoside 3'-phosphotransferase) and *tet<sup>R</sup>* (*tetM*, tetracycline resistance gene). Unique restriction sites are listed.

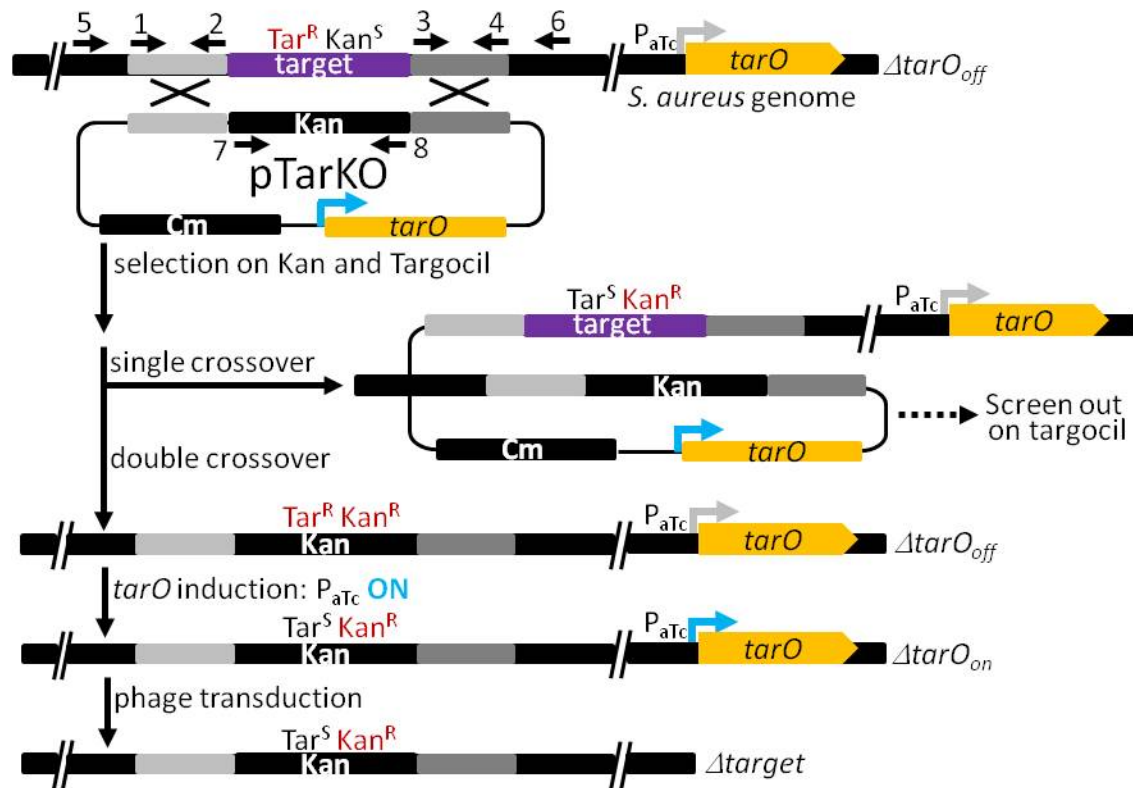

**Figure S3. Schematic of allelic exchange with the pTarKO targeting plasmid in *S. aureus*.** Recombineering plasmid isolated from DH10B *E. coli* (NEB 10-beta) is irradiated with UV and electroporated into *tarO<sub>off</sub>* *S. aureus*, and transformants are selected on plates containing both targocil (or targocil-II) and kanamycin. Mutants with a single crossover are screened out, and only mutants with a double crossover are selected from the double selection. A confirmed double-crossover mutant is grown in the presence of aTc to induce *tarO* for wall teichoic acid production, and the marked modified locus is transduced to other *S. aureus* strains by phage transduction. Primers for homologous arms, antibiotic marker, and confirmation of gene modification are shown as numbers: 1,AA; 2,AB; 3,BA; 4,BB; 5,CA; 6,CB; 7,KanR-F; 8,KanR-R.

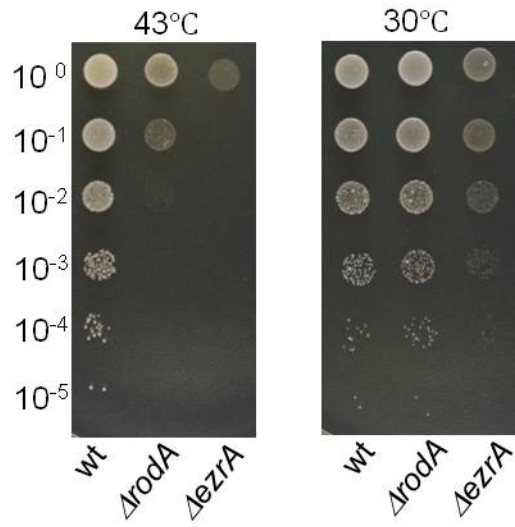

**Figure S4. Both  $\Delta rodA$  and  $\Delta ezrA$  show severe growth defects at the elevated temperature of 43°C.** 5  $\mu$ L of each dilution of  $\Delta rodA$  RN4220 and  $\Delta ezrA$  RN4220 grown to mid-log phase was spotted on TSA agar plate and incubated at 43°C or 30°C.

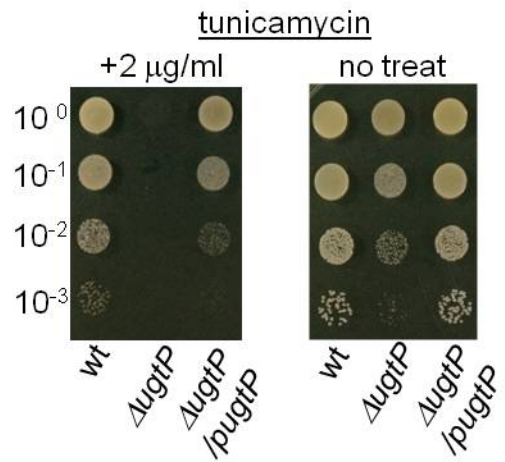

**Figure S5. UgtP is synthetically lethal with inhibition of wall teichoic acid biosynthesis.** Tunicamycin inhibits TarO, the first step of the WTA pathway in *S. aureus*, and prevents growth of a  $\Delta\text{ugtP}$  mutant. Susceptibility of  $\Delta\text{ugtP}$ ,  $\Delta\text{ugtP}/\text{pugtP}$ , and wildtype strains were tested against 2  $\mu\text{g/ml}$  tunicamycin. The phenotype is complementable.

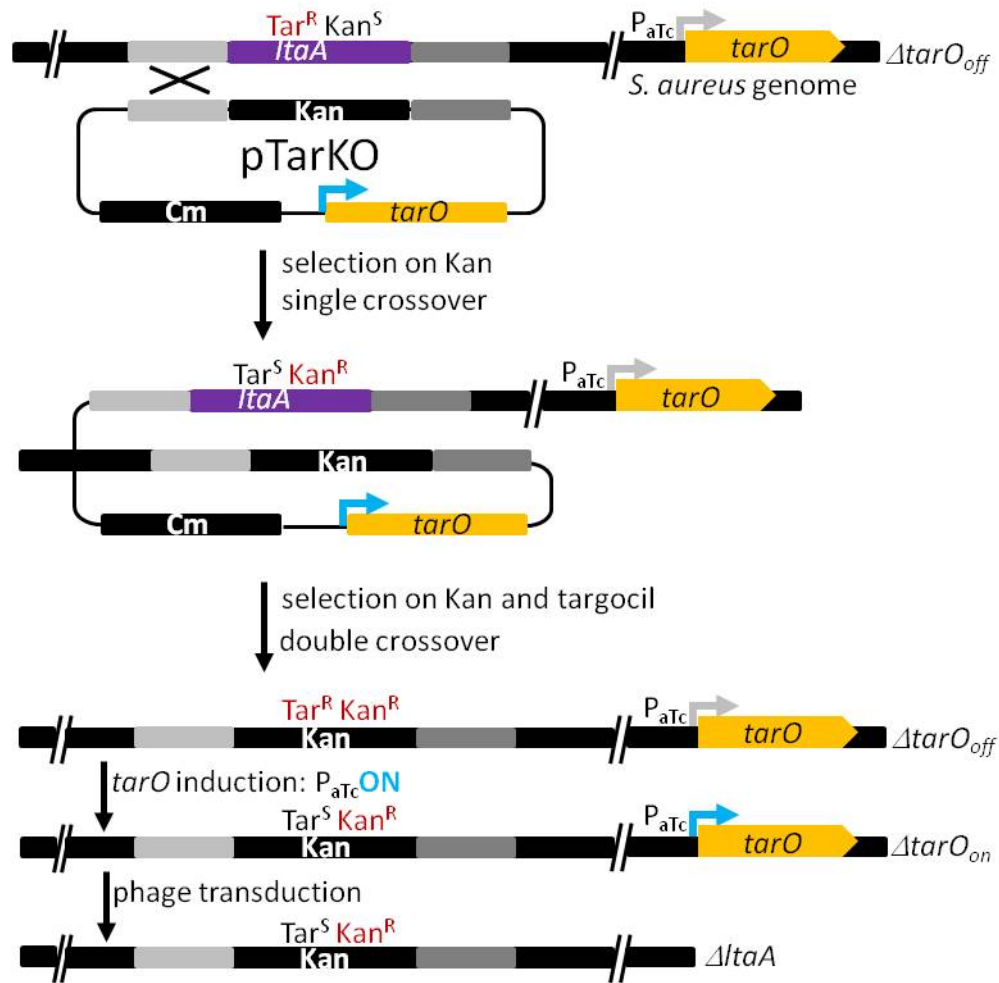

**Figure S6. Schematic of the two-step process to delete *itaA* using pTarKO.** A UV-irradiated targeting plasmid was electroporated into *tarO<sub>off</sub>* *S. aureus* and transformants are selected on plates containing only kanamycin to obtain mutants with a single crossover. A confirmed single crossover mutant is grown to high density and plated on both kanamycin and targocil to select for double crossover mutants.



a

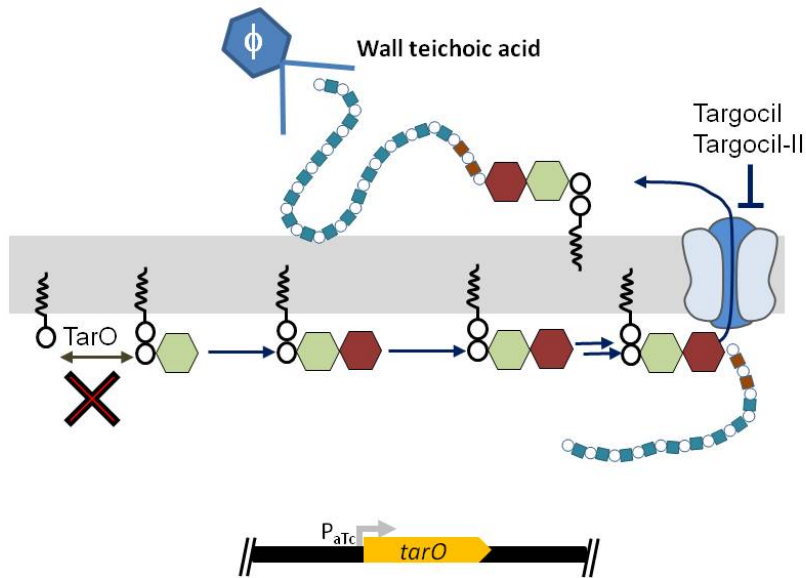

b

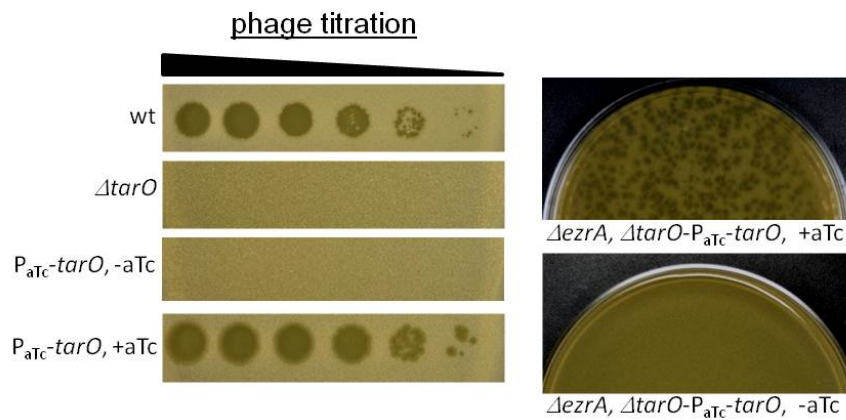

**Figure S7. Construction of an inducible *tarO* strain.** (a) Staphylococcal phage  $\Phi 11$  FRT cannot form plaques on  $\Delta tarO$  cells since wall teichoic acids serve as surface receptors for phage attachment prior to infection. Labels are the same as shown in **Figure 2**. (b) In the presence of aTc, which induces *tarO* expression for WTA production, the phage generated plaques on bacterial lawns of *S. aureus*. Phage lysate was prepared from the plaques and used for phage transduction. As an example,  $\Delta ezrA \Delta tarO$ - $P_{aTc}$ -*tarO* was mixed with phage  $\Phi 11$  in the presence or absence of 0.4  $\mu M$  aTc.

a

b

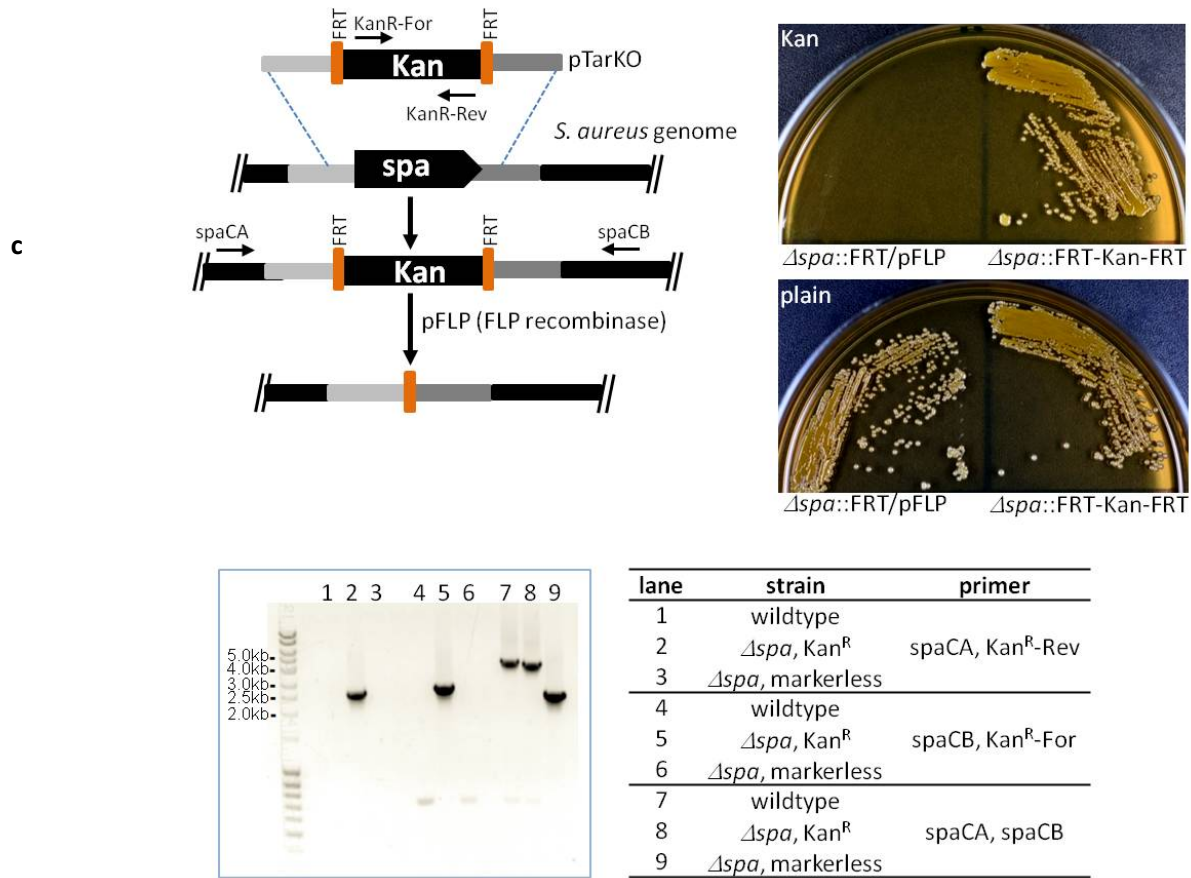

**Figure S8. Markerless deletion of *spa* using FRT/FLP recombinase. (a)** Schematic of the strategy to delete *spa* using pTarKO and to remove the antibiotic marker. **(b)** Phenotypic validation of  $\Delta spa::FRT-Kan-FRT$  and  $\Delta spa::FRT$  in the presence or absence of kanamycin. **(c)** PCR validation of allelic exchange of *spa* and removal of the kanamycin cassette.

**a**

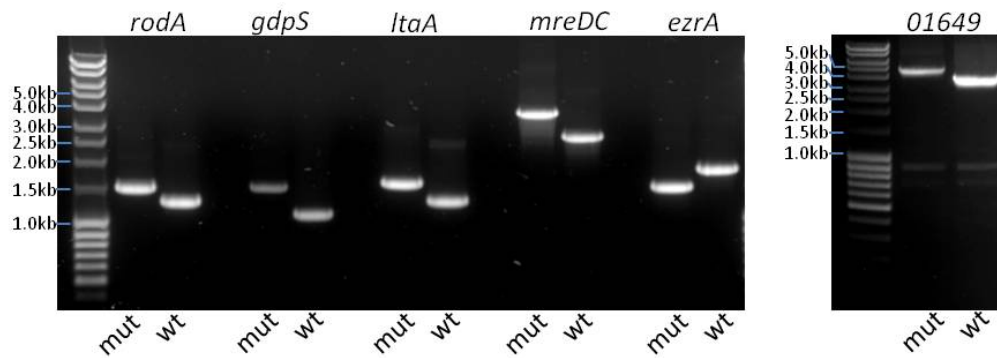

**b**

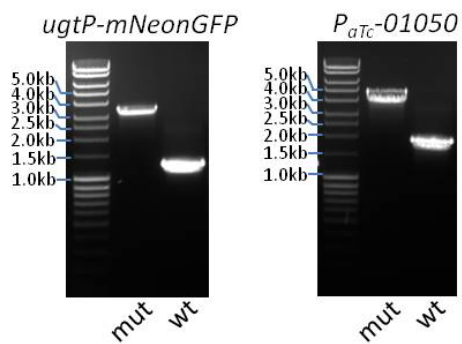

**Figure S9. PCR validation of allelic exchange of target loci. (a)** Deletions of *rodA*, *gdpS*, *ltaA*, *mreDC*, *ezrA*, and *SAOUHSC\_01649* in *S. aureus* were confirmed by PCR with primers CA and CB. **(b)** A C-terminal mNeonGFP fusion to UgtP and the exchange of the native promoter of *SAOUHSC\_01050* for an aTc-inducible promoter were confirmed by PCR with primers CA and CB.

a

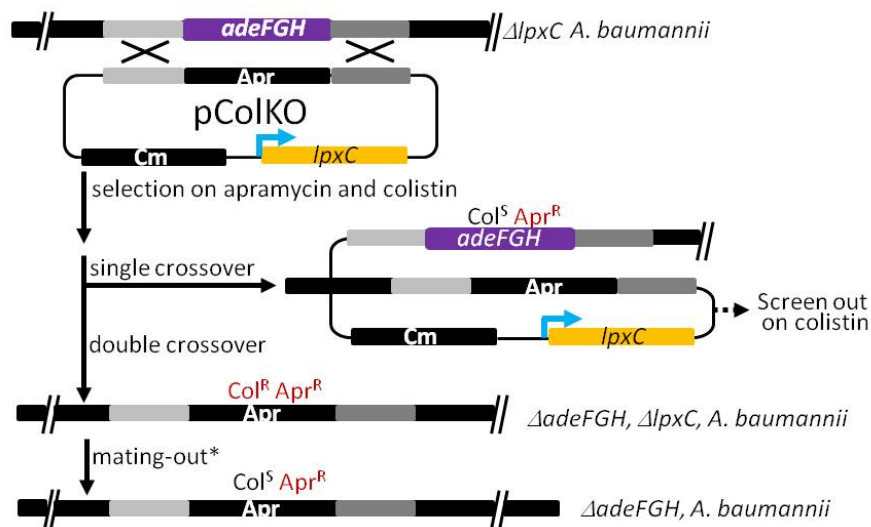

\*Selected on rifampin 0.04  $\mu\text{g}/\text{mL}$  and apramycin 100  $\mu\text{g}/\text{mL}$   
(rifampin MIC : wildtype 1  $\mu\text{g}/\text{mL}$ ,  $\Delta lpxC$  <0.01  $\mu\text{g}/\text{mL}$ )

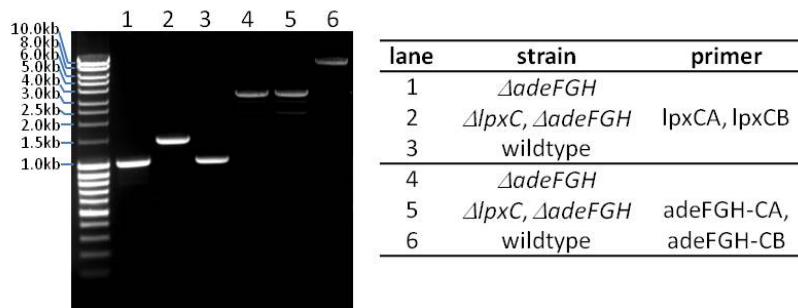

**Figure S10. Allelic exchange of the *adeFGH* locus with pColKO-*adeFGH* in *A. baumannii*.** (a) A targeting plasmid isolated from *E. coli* (NEB 10-beta) is irradiated with UV and electroporated into the pass- $\Delta lpxC$  *A. baumannii* strain, and transformants are selected on colistin and apramycin. Mutants with a single crossover are screened out, and only mutants with a double crossover are selected from the double selection. To transfer the marked deletion into wildtype *A. baumannii*, a mating-out assay was performed using the  $\Delta adeFGH$   $\Delta lpxC$  strain (donor) and wildtype (recipient). (b) Mutations transferred to wildtype were confirmed by PCR using primers CA and CB.

**Table S1. Strains and Plasmids**

| Strain                                        | Description                                                                                                                                                                                           | Source     |
|-----------------------------------------------|-------------------------------------------------------------------------------------------------------------------------------------------------------------------------------------------------------|------------|
| <b><i>S. aureus</i></b>                       |                                                                                                                                                                                                       |            |
| RN4220                                        | wild type                                                                                                                                                                                             | -          |
| HG003                                         | wild type                                                                                                                                                                                             | -          |
| $\Delta tarO$ RN4220                          | Tar <sup>R</sup>                                                                                                                                                                                      | Ref. 22    |
| $\Delta tarO_{on/off}$                        | $\Delta tarO$ pTP63-tarO RN4220                                                                                                                                                                       | This study |
| $\Delta rodA, \Delta tarO_{on/off}$           | Kan <sup>R</sup> , Cm <sup>R</sup> , Tar <sup>R</sup>                                                                                                                                                 | This study |
| $\Delta rodA$ RN4220                          | Kan <sup>R</sup>                                                                                                                                                                                      | This study |
| $\Delta rodA$ HG003                           | Kan <sup>R</sup>                                                                                                                                                                                      | This study |
| $\Delta ltaA, \Delta tarO_{on/off}$           | Kan <sup>R</sup> , Cm <sup>R</sup> , Tar <sup>R</sup>                                                                                                                                                 | This study |
| $\Delta ltaA$ RN4220                          | Kan <sup>R</sup>                                                                                                                                                                                      | This study |
| $\Delta ltaA$ HG003                           | Kan <sup>R</sup>                                                                                                                                                                                      | This study |
| $\Delta ltaA$ MW2                             | Kan <sup>R</sup>                                                                                                                                                                                      | This study |
| $\Delta mreDC, \Delta tarO$ RN4220            | tet <sup>R</sup> , Tar <sup>R</sup>                                                                                                                                                                   | This study |
| $\Delta mreDC$ RN4220                         | tet <sup>R</sup>                                                                                                                                                                                      | This study |
| $\Delta mreDC$ HG003                          | tet <sup>R</sup>                                                                                                                                                                                      | This study |
| $\Delta ezrA, \Delta tarO_{on/off}$           | Kan <sup>R</sup> , Cm <sup>R</sup> , Tar <sup>R</sup>                                                                                                                                                 | This study |
| $\Delta ezrA$ RN4220                          | Kan <sup>R</sup>                                                                                                                                                                                      | This study |
| $\Delta ezrA$ HG003                           | Kan <sup>R</sup>                                                                                                                                                                                      | This study |
| $\Delta ezrA$ USA300                          | Kan <sup>R</sup>                                                                                                                                                                                      | This study |
| $\Delta ezrA$ Newman                          | Kan <sup>R</sup>                                                                                                                                                                                      | This study |
| $\Delta gdpS, \Delta tarO_{on/off}$           | Kan <sup>R</sup> , Cm <sup>R</sup> , Tar <sup>R</sup>                                                                                                                                                 | This study |
| $\Delta gdpS$ RN4220                          | Kan <sup>R</sup>                                                                                                                                                                                      | This study |
| $\Delta gdpS$ HG003                           | Kan <sup>R</sup>                                                                                                                                                                                      | This study |
| $\Delta gdpS$ USA300                          | Kan <sup>R</sup>                                                                                                                                                                                      | This study |
| $\Delta spa, \Delta tarO_{on/off}$            | Kan <sup>R</sup> , Cm <sup>R</sup> , Tar <sup>R</sup>                                                                                                                                                 | This study |
| $\Delta spa$ HG003                            | Kan <sup>R</sup>                                                                                                                                                                                      | This study |
| $\Delta spa$ HG003                            | unmarked                                                                                                                                                                                              | This study |
| $\Delta 01649, \Delta tarO$ RN4220            | tet <sup>R</sup> , Tar <sup>R</sup>                                                                                                                                                                   | This study |
| $ugtP$ -mNeonGFP, $\Delta tarO_{on/off}$      | Kan <sup>R</sup> , Cm <sup>R</sup> , Tar <sup>R</sup>                                                                                                                                                 | This study |
| $ugtP$ - mNeonGFP RN4220                      | Kan <sup>R</sup>                                                                                                                                                                                      | This study |
| P <sub>aTc</sub> -01050, $\Delta tarO$ RN4220 | Kan <sup>R</sup> , Tar <sup>R</sup>                                                                                                                                                                   | This study |
| P <sub>aTc</sub> -01050 RN4220                | Kan <sup>R</sup>                                                                                                                                                                                      | This study |
| P <sub>aTc</sub> -01050 HG003                 | Kan <sup>R</sup>                                                                                                                                                                                      | This study |
| $\Delta ugtP$ RN4220                          | Kan <sup>R</sup>                                                                                                                                                                                      | Ref. 30    |
| $\Delta ugtP$ /pugtP                          | Kan <sup>R</sup> , Em <sup>R</sup>                                                                                                                                                                    | This study |
| $\Delta ltaA$ /pltaA                          | Kan <sup>R</sup> , Em <sup>R</sup>                                                                                                                                                                    | This study |
| <b><i>A. baumannii</i></b>                    |                                                                                                                                                                                                       |            |
| ATCC19606                                     |                                                                                                                                                                                                       | Ref. 43    |
| $\Delta lpxC$ ATCC19606                       | Kan <sup>R</sup>                                                                                                                                                                                      | Ref. 43    |
| $\Delta lpxC$ ATCC19606-pass                  | Kan <sup>R</sup><br><i>dapD</i> (DNA:CDS756: G→A, protein: none)<br><i>WP_031949781</i> (DNA: CDS1165:insertion(A), protein: frame shift)<br><i>baeS</i> (DNA:CDS307:C→T, protein: substitution: A→T) | This study |
| $\Delta lpxC, \Delta adeFGH$ ATCC19606-pass   | Kan <sup>R</sup> , apramycin <sup>R</sup>                                                                                                                                                             | This study |
| $\Delta adeFGH$ ATCC19606                     | apramycin <sup>R</sup>                                                                                                                                                                                | This study |
| $\Delta lpxC$ ATCC19606-pass/ <i>lpxC</i>     | Kan <sup>R</sup>                                                                                                                                                                                      | This study |
| <b><i>E. coli</i></b>                         |                                                                                                                                                                                                       |            |
| NEB 10-beta (DH10B™ derivative)               |                                                                                                                                                                                                       | NEB        |

**Continued Table S1. Strains and Plasmids**

| plasmid                                          | Description                           | Source     |
|--------------------------------------------------|---------------------------------------|------------|
| pKFC                                             | Cm <sup>R</sup> , ts-Ori-replication  | Ref. 5     |
| pFLP                                             | FLP recombinase                       | Ref. 15    |
| pTM204 <i>attLint</i>                            | tet <sup>R</sup>                      | Ref. 15    |
| <i>ugtP</i>                                      | pLOW- <i>ugtP-ltaA</i>                | This study |
| <i>ltaA</i>                                      | pLOW- <i>ugtP</i>                     | This study |
| pTarKO                                           |                                       | This study |
| pTP63                                            | Cm <sup>R</sup> , integrative plasmid | Ref. 30    |
| pTP63-P <sub>aTc</sub> - <i>tarO</i>             | Cm <sup>R</sup> , integrative plasmid | This study |
| pTarKO- <i>rodA</i> -Kan <sup>R</sup>            | <i>rodA</i> targeting vector          | This study |
| pTarKO- <i>ltaA</i> - Kan <sup>R</sup>           | <i>ltaA</i> targeting vector          | This study |
| pTarKO- <i>mreDC</i> -tet <sup>R</sup>           | <i>mreDC</i> targeting vector         | This study |
| pTarKO- <i>spa</i> -Kan <sup>R</sup>             | <i>spa</i> targeting vector           | This study |
| pTarKO- <i>ezrA</i> -Kan <sup>R</sup>            | <i>ezrA</i> targeting vector          | This study |
| pTarKO- <i>gdpS</i> -Kan <sup>R</sup>            | <i>gdpS</i> targeting vector          | This study |
| pTarKO- <i>ugtP</i> -gfp-Kan <sup>R</sup>        | <i>ugtP</i> targeting vector          | This study |
| pTarKO-01050-P <sub>aTc</sub> - Kan <sup>R</sup> | 01050 targeting vector                | This study |
| pTarKO-01649-tet <sup>R</sup>                    | 01649 targeting vector                | This study |
| pKFC- <i>rodA</i> -Kan <sup>R</sup>              | <i>rodA</i> targeting vector          | This study |
| pColKO                                           |                                       | This study |
| pColKO- <i>adeFGH</i> -Apr <sup>R</sup>          | <i>adeFGH</i> targeting vector        | This study |
| pWH1266                                          |                                       | Ref. 43    |
| <i>lpxC</i>                                      | pWH1266- <i>lpxC</i>                  | This study |

**Table S2. Primers**

| Primers            | Sequence (5' → 3') restriction site in red                      | Gene         |
|--------------------|-----------------------------------------------------------------|--------------|
| tarO-F-KasI        | ATA <b>GGCGCG</b> CTCTGAATCGACTCCTTAAATTGACCAC                  | <i>tarO</i>  |
| tarO-R-EcoRI       | AC <b>GAATTC</b> CCCTATTCTCTTTATGAGATGACTTACG                   | <i>tarO</i>  |
| tarO-rbs-tetF-KpnI | AGAG <b>GTACC</b> ATATCGATGAAGGTGAATAAATGGTT                    | <i>tarO</i>  |
| tarO-R-EcoRI       | ACA <b>GAATTC</b> TTTCATTCCCTATTCTCTTTATGAGAT                   | <i>tarO</i>  |
| kan-F              | GCGAACCATTTGAGGTGATAGGTAAGATTAT                                 | <i>kanR</i>  |
| kan-R              | TCCTAGGTACTAAAACAATTCATCCAGTAA                                  | <i>kanR</i>  |
| rodA-AA-BamHI      | TAA <b>GGATCC</b> TTCTATAACAAGCTTACGGTCAA                       | <i>rodA</i>  |
| rodA-AB            | CTTACCTATCACCTCAAATGGTTCGCCGGCTGTTGACGAGATGAATA                 | <i>rodA</i>  |
| rodA-BA            | TTACTGGATGAATTGTTTTAGTACCTAGGACGATATGTGCGATTTATACCATC           | <i>rodA</i>  |
| rodA-BB-SalI       | GATT <b>GTCGAC</b> GCACATCATTCTGAACAAAATAAA                     | <i>rodA</i>  |
| rodA-CA            | GGATAGTCATTTCCCTAAAACCTGCTACTTC                                 | <i>rodA</i>  |
| rodA-CB            | AGTATAGTAAGGAATGTAAATGAAGGAGTGA                                 | <i>rodA</i>  |
| ltaA-AA-BamHI      | TAA <b>GGATCC</b> TACAAAGGGTTTTATTACAGCCGCC                     | <i>ltaA</i>  |
| ltaA-AB            | ATAATCTTACCTATCACCTCAAATGGTTCGCCGGATATACATGCCTCTCGCAAATTC       | <i>ltaA</i>  |
| ltaA-BA            | TTACTGGATGAATTGTTTTAGTACCTAGGATTTAAACAATACATTTTATTTCTCGGCA      | <i>ltaA</i>  |
| ltaA-BB-SalI       | GATT <b>GTCGAC</b> AACAAATGGTAAGCGTGCCGAT                       | <i>ltaA</i>  |
| ltaA-CA            | CGTCATTGAGCACGATTTATTTATG                                       | <i>ltaA</i>  |
| ltaA-CB            | AAAAAGTATTAGATAAGCTAAATCAATGTGC                                 | <i>ltaA</i>  |
| gdpS-AA-SalI       | ATT <b>GTCGAC</b> ATCCAATCATTAAAGCCCACTATC                      | <i>gdpS</i>  |
| gdpS-AB            | ATCTTACCTATCACCTCAAATGGTTCGCAATAAATAGATTCCAGCGACTATAACAGA       | <i>gdpS</i>  |
| gdpS-BA            | TTACTGGATGAATTGTTTTAGTACCTAGGAAAAAATCAAGGGCGAAACAAAGTAA         | <i>gdpS</i>  |
| gdpS-BB-BamHI      | CCG <b>AAGCTT</b> AATAGCATGCTTTAACAGTCCTTCCTTA                  | <i>gdpS</i>  |
| gdpS-CA            | AATACAAATTATCCCATACAGCTATGCT                                    | <i>gdpS</i>  |
| gdpS-CB            | TTGAAAAATGATAGAGAAAAAGTACTGTTGATA                               | <i>gdpS</i>  |
| mreDC-AA-BamHI     | TAA <b>GGATCC</b> ATCATGATTAAGGCTGAAGACT                        | <i>mreDC</i> |
| mreDC-AB           | TTACCTATCACCTCAAATGGTTCGCCACCCAGAACACCTCTATTATG                 | <i>mreDC</i> |
| mreDC-BA           | TATGTTCAATAAAATAAECTTAGAAGATGCAATAGTTGAGTAGTTA                  | <i>mreDC</i> |
| mreDC-BB-SalI      | GATT <b>GTCGAC</b> ACCACGACCTACATTTTC                           | <i>mreDC</i> |
| mreDC-CA           | CAATGCTACAAACCTCCTAATACGC                                       | <i>mreDC</i> |
| mreDC-CB           | CCGTCGATTTTAGCGAATAATG                                          | <i>mreDC</i> |
| tetM-F             | CAACCCAAATCTCGCAATTTGAG                                         | <i>tetR</i>  |
| tetM-R             | CTAAGTTATTTTATTGAACATATATCTTACTT                                | <i>tetR</i>  |
| spa-AA-BamHI       | CCCG <b>GGATCC</b> AGATTTATGTTATAACAATCGGATTTAGTACAGCATA        | <i>spa</i>   |
| spa-AB             | TACTTTCTAGAGAATAGGAACTTCATTAATACCCCTGTATGTATTTGTAAAGTCATC       | <i>spa</i>   |
| spa-BA             | TATTCTCTAGAAAAGTATAGGAACTTCAAACAACAATACACAACGATAGATATCATTTTATCC | <i>spa</i>   |
| spa-BB-SalI        | TGCAG <b>GTCGAC</b> TTAGTATGGAGTGCACCATTCTTCAAAAAATTATTC        | <i>spa</i>   |
| spa-CA             | GTCAAGCCTGAAGTCGATATGACTATAA                                    | <i>spa</i>   |
| spa-CB             | ATCACTAGCAACAATGGTGGTGTAGC                                      | <i>spa</i>   |
| kan-FRT-F          | TATTCTCTAGAAAAGTATAGGAACTTCGCGAACCATTTGAGGTGATAGGTAAGATTAT      | <i>kanR</i>  |
| kan-FRT-R          | TACTTTCTAGAGAATAGGAACTTCTCCTAGGTACTAAAACAATTCATCCAGTAA          | <i>kanR</i>  |
| Kan For            | GCGAACCATTTGAGGTGATAGGTAAGATTAT                                 | <i>kanR</i>  |
| Kan Rev            | TCCTAGGTACTAAAACAATTCATCCAGTAA                                  | <i>kanR</i>  |
| ezrA-AA-BamHI      | TAA <b>GGATCC</b> AAACCTAATGAATAAACAACAGCGTCTAAA                | <i>ezrA</i>  |
| ezrA-AB            | ATCTTACCTATCACCTCAAATGGTTCGCTATATAACACCATATGCTTCTCCTCCTAAT      | <i>ezrA</i>  |
| ezrA-BA            | GGATGAATTGTTTTAGTACCTAGGACAGGTGTTACTAAACATATTGAAGAAGAAGTTAT     | <i>ezrA</i>  |
| ezrA-BB-SalI       | ATT <b>GTCGAC</b> AAAAGTTTTATTAGCTATCTTCATCGC                   | <i>ezrA</i>  |
| ezrA-CA            | TGGTAACTAATTGACGTGCTTGAC                                        | <i>ezrA</i>  |
| ezrA-CB            | TGACGGACGTCATTTATTTAACTCAGT                                     | <i>ezrA</i>  |

**Continued Table S2. Primers**

| Primers                 | Sequence (5'→3'), restriction site in red                                         | Gene                   |
|-------------------------|-----------------------------------------------------------------------------------|------------------------|
| 01649-AA-BamHI          | CCCGG <b>GGATCC</b> AGCGCATGGTTGTAATAATTTAACTTTGCA                                | <i>01649</i>           |
| 01649-AB                | CAACTCAAATTGCGAGATTTGGGTTGTTAGTCCCTCCACTATGCTGCTTGATA                             | <i>01649</i>           |
| 01649-BA                | GATAGATAAAGTAAGATATATGTTCAATAAAATAACTTAGATGAGTCGAAAAATAAATA<br>ACTTTTATGATGTACAAC | <i>01649</i>           |
| 01649-BB-SalI           | TGCAG <b>GTGAC</b> CCTAGAACGATATATTTCCGGATTACTTGTGTA                              | <i>01649</i>           |
| 01649-CA                | CAGGTGGAGACTTAGGTAGAGATG                                                          | <i>01649</i>           |
| 01649-CN                | CAATTTCAAGTTCAAATTGAGCAGGTGC                                                      | <i>01649</i>           |
| ugtP-gfp-AB             | AGCTCCACCAGCGCTACCACCACCTTTAACGAAGAATCTTGCATATAAAGG                               | <i>ugtP</i>            |
| ugtP-gfp-BA             | TAATCTTACCTATCACCTCAAATGGTTCGCTTACGCTAATCATAAAAAATTTCAATTTAA                      | <i>ugtP</i>            |
| ugtP-gfp-BB-HindIII     | GGC <b>AAGCTT</b> CCTATCATTGAGCCGAATCCTTG                                         | <i>ugtP</i>            |
| ugtP-gfp-CA             | ATGGTTACTCAAATAAAAAGATATTGATTA                                                    | <i>ugtP</i>            |
| ugtP-gfp-CB             | TACTTAGCTTTTTCTCTATTTACTATAAAGT                                                   | <i>ugtP</i>            |
| ugtP-F-SalI             | AAGTT <b>GTGAC</b> CAAATAACGGAGGGTGGCT                                            | <i>ugtP</i>            |
| ugtP-R-BamHI            | GTTTTAA <b>GGATCC</b> TTATTTAACGAAGAATCTTGCATATA                                  | <i>ugtP</i>            |
| mNeon-GFP-F             | ATGGTGAGTAAAGGTGAGGAGGATAACA                                                      | <i>GFP</i>             |
| mNeon -GFP-R            | TTATTTATACAACATCCATTCCATA                                                         | <i>GFP</i>             |
| mNeon -GFP-Km-R         | TTACTGGATGAATTGTTTTAGTACCTAGGATTATTTATACAACATCCATTCCATA                           | <i>GFP</i>             |
| 01050-AA-SalI           | ATT <b>GTGAC</b> GAATATACAGTTCAA AAATTGAAAAGAGA                                   | <i>01050</i>           |
| 01050-AB                | TACTGGATGAATTGTTTTAGTACCTAGGACGTTACAACCTTATAGTACTTATCCC                           | <i>01050</i>           |
| 01050-tetR-rbs-BA       | GTATGATGGTACCATATCGATGAAGGTGAATAAATGACTGGAGAACAATTTACTCAAATT                      | <i>01050</i>           |
| 01050-BB-HindIII        | TTAT <b>AAGCTT</b> TACGTTTTTCTTTTTTCTTAGC                                         | <i>01050</i>           |
| 01050-CA                | CGGTACACATTATGATGTTGCTTTTC                                                        | <i>01050</i>           |
| 01050-CB                | GTTGTAAATTTGACGTCGCTCTTC                                                          | <i>01050</i>           |
| P <sub>aTc</sub> -Km-F  | ATAATCTTACCTATCACCTCAAATGGTTCGCCGTGAAGTTACCATCACGGAAA                             | <i>aTc promoter</i>    |
| P <sub>aTc</sub> -rbs-R | TTATTCACCTTCATCGATATGGTACCATCATACTCTATCAATGATAGAGAGCT                             | <i>aTc promoter</i>    |
| Apr-F                   | TTTGCAAGCAGCAGATTACGC                                                             | <i>Apr<sup>R</sup></i> |
| Apr-R                   | CGTCATCTCGTTCTCCGCTCAT                                                            | <i>Apr<sup>R</sup></i> |
| KFC-F                   | AAGTTGGGTAACGCCAGGGTTTTC                                                          |                        |
| KFC-R                   | ATTGTGAGCGGATAACAATTTACACACA                                                      |                        |
| lpxC-prom-F-SalI        | TTTAGCGTACAATCTATTGAAAGGCA                                                        | <i>lpxC</i>            |
| lpxC-R-HindIII          | TTATGTCACACTCACGTATGGAATTG                                                        | <i>lpxC</i>            |
| lpxC-prom-F-KasI        | TTTAGCGTACAATCTATTGAAAGGCA                                                        | <i>lpxC</i>            |
| lpxC-R-EcoRI            | TTATGTCACACTCACGTATGGAATTG                                                        | <i>lpxC</i>            |
| adeFGH-AA-SalI          | GGC <b>GTGAC</b> GAAGATAAACTGCTGAAATCGGC                                          | <i>adeFGH</i>          |
| adeFGH-AB               | GCGTAATCTGCTGCTTGCAAACGGGAAAATGACATGAGGTGCT                                       | <i>adeFGH</i>          |
| adeFGH-BA               | ATGAGCGGAGAACGAGATGACGAGGGGGCGGTTGGAGTAGTTA                                       | <i>adeFGH</i>          |
| adeFGH-BB-KpnI          | TAG <b>GGTACC</b> GCTCACAAGCTAACTCTGCTGTTTAT                                      | <i>adeFGH</i>          |
| adeFGH-CA               | AGTTCAGCGACCCAATCTACAAAC                                                          | <i>adeFGH</i>          |
| adeFGH-CB               | AGAACTTTTTGGTGCAGATTACGC                                                          | <i>adeFGH</i>          |



| <b>Table S3. Synthetic lethal with <math>\Delta tarO</math></b> |             |             |
|-----------------------------------------------------------------|-------------|-------------|
| SAOUHSC                                                         | Gene name   | Source      |
| 00965                                                           |             | Ref. 30, 31 |
| 00618                                                           |             | Ref. 30     |
| 00718                                                           |             | Ref. 30     |
| 00665                                                           | <i>graR</i> | Ref. 30, 31 |
| 02611                                                           | <i>lyrA</i> | Ref. 30, 31 |
| 00668                                                           | <i>vraG</i> | Ref. 30, 31 |
| 00948                                                           |             | Ref. 30     |
| 00953*                                                          | <i>ugtP</i> | Ref. 30     |
| 00667                                                           | <i>vraF</i> | Ref. 30, 31 |
| 01187                                                           | <i>stk1</i> | Ref. 30     |
| 00869                                                           | <i>dltA</i> | Ref. 30, 31 |
| 00870                                                           | <i>dltB</i> | Ref. 30, 31 |
| 00871                                                           | <i>dltC</i> | Ref. 30, 31 |
| 00872                                                           | <i>dltD</i> | Ref. 30, 31 |
| 00952*                                                          | <i>ltaA</i> | This study  |

\* manipulated in this study
